1 Polyploidy of semi-cloned embryos generated from parthenogenetic haploid  
2 embryonic stem cells

3

4 Eishi Aizawa, Charles-Etienne Dumeau, Remo Freimann, Giulio Di Minin, Anton Wutz\*

5

6 Institute of Molecular Health Sciences, Swiss Federal Institute of Technology, ETH  
7 Zurich, Zurich, Switzerland

8 \*Correspondence: awutz@ethz.ch

9

10 **Abstract**

11 In mammals, the fusion of two gametes, an oocyte and a spermatozoon, during  
12 fertilization forms a totipotent zygote. There has been no reported case of natural  
13 parthenogenesis, in which embryos develop from unfertilized oocytes. The genome and  
14 epigenetic information of haploid gametes are crucial for the proper development of  
15 embryos. Haploid embryonic stem cells (haESCs) are unique stem cells established from  
16 uniparental blastocysts and possess only one set of chromosomes. Previous studies  
17 have shown that sperm or oocyte genome can be replaced by haESCs with or without  
18 manipulation of genomic imprinting for generation of mice. Recently, these remarkable  
19 semi-cloning methods have been applied for screening of key factors of mouse  
20 embryonic development. While haESCs have been applied as substitute of gametic  
21 genome, the fundamental mechanism how haESCs contribute to the genome of  
22 totipotent embryos is unclear. Here, we show the generation of fertile semi-cloned mice  
23 by injection of parthenogenetic haESCs (phaESCs) into oocytes after deletions of two

24 differentially methylated regions (DMRs), the *IG*-DMR and *H19*-DMR. For characterizing  
25 the genome of semi-cloned embryos further we establish ESC lines from semi-cloned  
26 blastocysts. We report that polyploid karyotypes are observed frequently in semi-cloned  
27 ESCs (scESCs). Our results confirm that mitotically arrested phaESCs provide high  
28 efficiency for semi-cloning when the *IG*-DMR and *H19*-DMR are deleted. In addition, we  
29 highlight the occurrence of polyploidy that needs to be considered for further  
30 improvement for development of semi-cloned embryos derived by haESC injection.

31

32

## 33 **Introduction**

34 The genetic information of an oocyte and a spermatozoon are inherited to the offspring.  
35 Both maternal and paternal genomic information are required for normal development of  
36 mammalian embryos because uniparental embryos cause developmental defect due to  
37 the imbalance of genomic imprinting [1]. Despite the importance of gametic genome,  
38 much remains to be elucidated what is required in genomic information of gametes to  
39 form a totipotent zygote. In mice, previous studies have shown that two differentially  
40 methylated regions within the *H19-Igf2* and *Gtl2-Dlk1* imprinted gene clusters had critical  
41 contributions to the genome of embryos [2, 3]. Both regions are normally methylated and  
42 unmethylated on the paternally and maternally inherited chromosomes, respectively.  
43 Deletion of the *H19*-DMR and the intergenic germline-derived DMR (*IG*-DMR) resulted  
44 in loss of expression of the maternally expressed *H19* and *Gtl2* genes from the maternal  
45 allele, respectively [4, 5]. Deletion of the *H19*-DMR or combined deletions of the *H19*-  
46 DMR and *IG*-DMR from the genome of non-growing oocytes facilitated the generation of

47 bimaternal mice by substituting the manipulated genome of non-growing oocytes for  
48 sperm by injection into mature oocytes [2, 3].

49 Recent studies have also explored the possibility to substitute the gametic genome  
50 by mouse haploid embryonic stem cells (haESCs). Haploid ESCs are unique stem cell  
51 lines established from either parthenogenetic [6, 7] or androgenetic haploid blastocysts  
52 [8, 9]. Haploid ESCs possess a single set of chromosomes, that is 20 chromosomes in  
53 mice, similar to gametes. Due to their uniqueness of haploidy, haESCs have been  
54 applied to various studies in original manners. One application is for genetic screening.  
55 While heterozygous mutations in diploid cells are often masked phenotypically,  
56 hemizygous mutations in haploid cells directly express phenotypes. For example, gene  
57 trap vectors have been applied to screen genes required for chemical toxicity, self-  
58 renewal of ESCs and X-chromosome inactivation [6, 10-12]. Another considerable  
59 application of haESCs is as gametic genome. Several reports have demonstrated the  
60 application of either androgenetic haESC (ahaESC) or parthenogenetic haESC  
61 (phaESC) for substituting the paternally derived sperm genome to generate semi-cloned  
62 mice [8, 9, 13, 14]. Furthermore, it has been demonstrated that the oocyte genome can  
63 be replaced by the genome of phaESCs for generation of semi-cloned mice, albeit at low  
64 frequency [15]. In contrast to oocytes and spermatozoa, genetic mutations can be readily  
65 introduced to haESCs owing to their self-renewal capacity in culture. Methods for  
66 introducing genetic modifications into the germline with haESCs is a considerable  
67 approach for studies including embryonic development and generation of transgenic  
68 animals. Recent studies have already applied the combination of CRISPR-Cas9-based  
69 genome editing and haESCs as substitute of the gametic genome for genetic screening

70 approaches [16], characterization of imprinting regions for embryonic development [17],  
71 and identification of important amino acids within the DND1 protein for primordial germ  
72 cell development [18].

73 While these remarkable studies have successfully applied haESCs as substitutes  
74 for gametic genomes, the mechanism how haESCs contribute to the genome of  
75 totipotent embryos remains to be clarified. For example, sperm and haESCs genomes  
76 are fundamentally different as most of the sperm genome is packaged with protamines,  
77 but the chromosomes of haESCs have a conventional nucleosomal structure. Proper  
78 segregation of both maternal and paternal haploid chromosome sets into each  
79 blastomere is required at the first division of the zygote to form a developmentally  
80 competent 2-cell embryo. Otherwise, developmental defects due to aneuploidy or  
81 polyploidy arise in embryos [19]. Polyploidy is the cell state possessing more than two  
82 complete sets of chromosomes, which is observed in various species including plants  
83 and yeasts [20]. In mammals, polyploid embryos can occur by polyspermy or abnormal  
84 chromosome segregation, but show developmental defects and arrest [20-22].

85 In this study, we report that the generation of healthy mice by injection of mitotically  
86 arrested phaESCs with manipulation of genomic imprinting into metaphase II (MII)  
87 oocytes. We established semi-cloned ESCs (scESCs) derived from semi-cloned  
88 blastocysts for characterization of their ploidy status. We find that scESCs exhibited  
89 polyploidy, indicating cautious analysis is required for the study of semi-cloned embryos  
90 generated by application of haESCs.

91

92

## 93 **Results**

### 94 **Deletions of the *IG*-DMR and *H19*-DMR in haESC lines**

95 A previous study has reported that bimaternal embryos generated by substituting the  
96 paternal genome of sperm by the haploid genome of non-growing oocytes cause  
97 developmental defects and arrest in embryogenesis [23]. These defects were largely  
98 overcome by manipulation of genomic imprinting by deleting the *IG*-DMR and *H19*-DMR  
99 from the genome of non-growing oocytes resulting in the development of bimaternal mice  
100 [2, 3]. These studies indicate that imprinted gene expression regulated by the *IG*-DMR  
101 and *H19*-DMR is the key barrier, which prevents the development in bimaternal embryos.

102 In order to manipulate genomic imprinting in phaESCs, the CRISPR-Cas9 system  
103 was used to delete the *IG*-DMR and *H19*-DMR in a phaESC line that was established  
104 from a 129S6/SvEvTac mouse oocyte (Fig 1A and S1A-B Fig). After the culture of single  
105 cells transfected simultaneously with CRISPR-Cas9 plasmids and *piggyBac* transposon  
106 plasmids for EGFP expression, 2 phaESC lines, termed double-knockout phaESC line 1  
107 (DKO-phaESC-1) and line 2 (DKO-phaESC-2), were selected by PCR-based genotyping  
108 (S1C Fig). DKO-phaESC lines were labelled with EGFP to distinguish embryos derived  
109 from DKO-phaESCs for further studies. DNA sequencing confirmed the deletions of  
110 4,168 base pairs (bp) in the *IG*-DMRs for both DKO-phaESC-1 and DKO-phaESC-2 (Fig  
111 1B). Also, deletions of 3,908 and 3,927 bp in the *H19*-DMRs were confirmed in DKO-  
112 phaESC-1 and DKO-phaESC-2, respectively. Both ESC lines had a similar morphology  
113 to the parental phaESC line (Fig 1C), and an intact haploid karyotype was confirmed by  
114 analysis of metaphase chromosome spreads (Fig 1D).

115 The maternally expressed *Gtl2* gene maps to a large imprinted cluster on mouse

116 chromosome 12 and is regulated by the paternally methylated *IG*-DMR [24]. The  
117 maternally expressed gene *H19* maps to the paternally expressed *Igf2* gene on  
118 chromosome 7 and is regulated by a shared *H19*-DMR. As expected, transcription of  
119 *Gtl2* and *H19* was lost in both DKO-phaESC-1 and DKO-phaESC-2 (Fig 1E). In addition,  
120 expression of the paternally expressed *Dlk1* and *Igf2* genes, which are adjacent to *Gtl2*  
121 and *H19*, respectively, were slightly reduced in DKO-phaESC-1 and DKO-phaESC-2  
122 compared with the expression of the parental phaESC line.

123

124 **Fig 1. Generation of the *IG*-DMR and *H19*-DMR deletions in haESCs.** (A) Strategy for  
125 generating the *IG*-DMR and *H19*-DMR deletions in phaESC lines that were established  
126 from activated mouse oocytes and were marked by integration of CAG-EGFP-IRES-  
127 hygro *piggyBac* transposon. Deletions of DMRs in the *Gtl2* and *H19* imprinted gene loci  
128 were engineered by simultaneous transfection with four expression vectors encoding  
129 CRISPR-Cas9 nucleases. (B) Sequences of PCR fragments amplified over the deleted  
130 regions confirmed the loss of both DMRs in DKO-phaESC-1 and DKO-phaESC-2. (C)  
131 Morphology of DKO-phaESC lines. Scale bar, 200  $\mu$ m. (D) Haploid karyotypes were  
132 observed in both DKO-phaESC-1 and DKO-phaESC-2. (E) Transcription of imprinted  
133 genes *Gtl2* and *H19*, both of which are maternally expressed and regulated by the *IG*-  
134 and *H19*-DMRs, was reduced in DKO-phaESC-1 and DKO-phaESC-2. Gene expression  
135 was normalized to *Gapdh* relative to the parental cell line. Data represents relative  
136 expression of each sample with the mean values and standard deviation (n = 2). \*\* P <  
137 0.01; \* P < 0.05; ns, non-significant.

138

## 139 **Generation of semi-cloned embryos and scESCs by** 140 **injection of DKO-phaESCs into oocytes**

141 For assessing the potential of DKO-phaESCs as sperm replacement, we injected single  
142 cells into MII oocytes that were obtained from superovulated B6D2F1 female mice (Fig  
143 2A). Previously, ahaESCs that were arrested in mitosis at M-phase had been used as  
144 sperm substitute with greater efficiency than ahaESCs in G0- or G1-phase, whereby the  
145 extrusion of the second and a pseudo polar body after injection were observed [9].  
146 Following this report, we treated DKO-phaESC-2 with demecolcine and purified the  
147 metaphase arrested population of haploid cells by cell sorting (Fig 2B).

148 Semi-cloned embryos were constructed by injection of M-phase DKO-phaESC-2  
149 cells into MII oocytes, followed by activation with strontium chloride. After activation, the  
150 majority of semi-cloned embryos exhibited weak EGFP fluorescence distributed over the  
151 cytoplasm. However, a small number of embryos displayed a single round area of  
152 intense EGFP expression (Fig 2C), which indicates that the plasma membrane of DKO-  
153 phaESC-2 cells remained intact during injection. Semi-cloned embryos were cultured *in*  
154 *vitro* and developed to the 2-cell stage at the ratio of 58.7% (98/167), whereby little or no  
155 EGFP expression was detected (Table 1). Four-cell embryos initiated EGFP expression  
156 at day 2 after injection, followed by development to blastocysts at the ratio of 12.6%  
157 (21/167). All the blastocysts exhibited EGFP expression, indicating DKO-phaESC-2 cells  
158 contributed to the blastocyst genome and no parthenogenetic blastocysts developed.

159 To further analyze the semi-cloned blastocysts, we established 4 semi-cloned ESC  
160 lines scESC-1 to scESC-4 (S2A Fig). Genotyping revealed that these scESC lines  
161 possessed both wild-type and deleted alleles of the *IG-DMR* and *H19-DMR*, confirming

162 the contribution of the DKO-phaESC and the oocyte genomes (S2B Fig). We next  
163 analysed the DNA content of all 4 scESC lines by Hoechst staining and flow cytometry  
164 (Fig 2D). scESC-2 exhibited an expected diploid DNA content, while the other 3 scESC  
165 lines appeared to be polyploid. Two scESC lines, scESC-1 and scESC-3, had a triploid  
166 DNA content, and scESC-4 contained cells with a diploid and tetraploid DNA content.  
167 The analysis of metaphase chromosomes confirmed a triploid karyotype in scESC-1 and  
168 scESC-3, and a tetraploid karyotype in scESC-4 (Fig 2E). The observation of polyploidy  
169 in 3 out of 4 scESC lines suggests that abnormal chromosome segregation in semi-  
170 cloned embryos is a frequent event. Considering that polyploidy is not compatible with  
171 mouse development [21, 22], it might be a key factor limiting the yield of semi-cloned  
172 mice.

173

174 **Fig 2. Characterization of scESC lines derived by injection of DKO-phaESCs into**

175 **oocytes.** (A) A scheme of the generation of scESC lines by injection of DKO-phaESCs  
176 into MII oocytes. (B) DKO-phaESCs were arrested in metaphase with demecolcine for 8  
177 hours and sorted for a 2n DNA. The peak of the Hoechst intensity corresponding to 2n  
178 DKO-phaESCs is indicated (asterisk). (C) Semi-cloned embryo development after  
179 injection of DKO-phaESCs into oocytes. EGFP fluorescence merged with bright field  
180 images are shown. At day 4, morulae developed to blastocysts. Scale bar, 200  $\mu$ m. (D)  
181 DNA content analysis of 4 scESC lines using flow cytometer after Hoechst staining. DNA  
182 content at the G1 phase of scESC-1 and scESC-3 appeared in the middle between the  
183 DNA content of G1 and G2 phase control diploid ESCs, indicating scESC-1 and scESC-3  
184 are triploid. scESC-4 contained both diploid and tetraploid cells. (E) Metaphase spreads



185 showed triploid karyotypes of scESC-1 and scESC-3, and a tetraploid karyotype of  
186 scESC-4.

187

188 **Table 1. Summary of preimplantation development of semi-cloned embryos**  
189 **derived by injection of DKO-phaESCs into oocytes.**

190

| No. of oocytes injected | No. of 2-cell embryos | No. of 4-cell embryos | No. of morulae | No. of blastocysts (% of oocytes injected) |
|-------------------------|-----------------------|-----------------------|----------------|--------------------------------------------|
| 167                     | 98                    | 50                    | 43             | 21 (12.6%)                                 |

191

## 192 **Generation of semi-cloned mice from semi-cloned** 193 **embryos**

194 In order to investigate whether semi-cloned embryos are competent to develop to mice,  
195 we injected DKO-phaESC-2 cells into MII oocytes that were obtained from superovulated  
196 B6D2F1 females. Subsequently, semi-cloned embryos were cultured to the 2-cell stage  
197 and transferred to oviducts of pseudopregnant Swiss Webster females. We chose Swiss  
198 Webster recipients for their albino coat color, which is readily distinguished from the  
199 agouti coat color of phaESCs and B6D2F1 oocytes. In parallel, albino 2-cell embryos  
200 were derived from Swiss Webster mice by *in vitro* fertilization (IVF) as a technical control.

201 A total of 39 semi-cloned and 20 control 2-cell embryos were transferred to 4 recipient  
202 females (Table 2). Two of the four recipient females maintained pregnancy and delivered  
203 6 pups (termed progeny no.1-6) and 1 pup (progeny no.7) (Fig 3A). Progeny no. 6 and  
204 7 had dark eye color and toe biopsies indicated EGFP expression under UV illumination

205 (Fig 3B). Genotyping confirmed that progeny no. 6 and 7 were female and heterozygous  
206 for the *IG*-DMR and *H19*-DMR, carrying wild-type and deletion alleles (Fig 3C). Both  
207 mice grew normally without any apparent phenotypes or health problems and delivered  
208 full-term pups after mating with Swiss Webster males (Fig 3D). Transmission of EGFP  
209 transgene was observed in about half of these pups (7/15) in the expected Mendelian  
210 manner (S3 Fig). Bisulfite DNA sequencing demonstrated that progeny no. 6 and 7  
211 carried both methylated and unmethylated DMR alleles in 3 imprinted genes, *Kcnq1*,  
212 *Igf2r* and *Peg13* (Fig 3E). Some methylation patterns including *Kcnq1* and *Peg13* of  
213 progeny no.6 and *Igf2r* of progeny no. 7 appeared slightly hypermethylated. Considering  
214 the similarity to the control mouse, the 2 semi-cloned mice possessed normal  
215 methylation patterns in the 3 imprinted genes that we investigated.

216

217 **Fig 3. Generation of semi-cloned mice by transfer of semi-cloned embryos into**  
218 **recipient mothers.** (A) 7 offspring (progeny no. 1-7) were obtained from 2 albino  
219 recipient mothers after transfer of semi-cloned 2-cell embryos. Progeny no. 6 (indicated  
220 by asterisk) and no. 7 displayed black eyes and agouti coat color indicating DKO-  
221 phaESC derived pigmentation. (B) Toe biopsies of progeny no. 1-7. Biopsies of progeny  
222 no. 6 and 7 expressed EGFP under UV illumination. (C) Genotyping of progeny. Progeny  
223 no. 6 and 7 possessed wild type and deletion alleles of the *IG*-DMR and *H19*-DMR. (D)  
224 Mating of semi-cloned progeny no. 6 and 7 with wild type males yielded healthy pups  
225 (indicated by asterisk). (E) Bisulfite DNA methylation analysis of *Kcnq1*, *Igf2r* and *Peg13*  
226 in biopsies of semi-cloned and control mice. White circles represent unmethylated CpGs;  
227 black circles represent methylated CpGs.

228

229 **Table 2. Summary of semi-cloned mice generation by injection of DKO-phaESCs**

230 **into oocytes.**

231

| Embryo types | No. of oocytes injected | No. of 2-cell embryos | No. of transferred 2-cell embryos | No. of delivered pups (% of transferred 2-cell embryos) |
|--------------|-------------------------|-----------------------|-----------------------------------|---------------------------------------------------------|
| Control      | -                       | -                     | 20                                | 5 (25%)                                                 |
| Semi-cloned  | 50                      | 39                    | 39                                | 2 (5.1%)                                                |

232

233

## 234 Discussion

235 The successful production of fertile mice demonstrated that phaESCs with deletions of

236 the *IG-DMR* and *H19-DMR* can be used as sperm replacement for mouse development.

237 We used DKO-phaESCs for injection in this study, that had been treated with

238 demecolcine to harvest 2 sets of chromosomes at the onset of mitotic spindle formation

239 in M-phase. According to the previous study, M-phase ahaESCs contributed to semi-

240 cloned embryos better than G0- or G1-phase ahaESCs [9]. The study reported the

241 extrusion of the second polar body and pseudo polar body after the injection of M-phase

242 ahaESCs. Consistent with this report, we observed the extrusion of two polar bodies

243 after the injection of DKO-phaESCs in our study (Fig 2C). Semi-cloned blastocysts and

244 semi-cloned mice were efficiently generated at the ratio of 12.6% against oocytes

245 injected (21/167) and 5.1% against transferred 2-cell embryos (2/39), respectively (Table

246 1,2). The results indicate that the cell cycle between DKO-phaESCs arrested at M-phase

247 and oocytes arrested at MII were well synchronized.

248       Meanwhile, we unexpectedly observed that some scESC lines derived from semi-  
249 cloned embryos were triploid or contained a mixture of diploid and tetraploid cells (Fig  
250 2D and E). Several reasons can be assumed why these polyploid cells developed. For  
251 example, it is possible that diploidization of DKO-phaESCs before the first cleavage of  
252 semi-cloned embryos occurred or diploid ESCs were erroneously injected. In these  
253 cases, 2n chromatids of DKO-phaESCs would contribute to an embryo, resulting in the  
254 generation of a triploid embryo. A mixed karyotype of diploidy and tetraploidy was also  
255 observed in a scESC line. This is presumably caused by erroneous chromosome  
256 segregation at the 2nd or later cleavage [25]. A consequence of segregation defect  
257 possibly caused tetraploidy in a blastomere, while other blastomere(s) might have  
258 proceeded normal chromosome segregation and maintained diploid karyotype. As a  
259 result, both diploid and tetraploid cells might have developed in an embryo. Several  
260 studies on chimeric blastocysts containing diploid and tetraploid embryonic cells have  
261 shown that tetraploid cells contributed to extra-embryonic tissues but rarely to the fetus  
262 [26-28]. Nevertheless, homogenously tetraploid embryos formed blastocysts similar to  
263 diploid embryos during preimplantation development although their development was  
264 retarded before 15 days of gestation [21, 22]. Considering these results, it is reasonable  
265 that tetraploid cells developed to inner cell mass of the blastocyst and a scESC line  
266 containing diploid and tetraploid cells was generated in our study. Various possibilities  
267 can be considered as the cause of polyploidy by haESC injection. Unexpected polyploidy  
268 is possibly an impediment for the development of semi-cloned mice and could be a target  
269 for improvement to increase the yield of normal semi-cloned embryos in future. Further

270 studies are expected to reveal the mechanism of polyploidy in semi-cloned embryos.

271 The uniqueness of haESC as replacement of gametic genome possesses substantial  
272 potential of applications especially because genetic mutations can be efficiently  
273 introduced into haESCs in contrast to oocytes and spermatozoa. We demonstrated that  
274 manipulation of haESCs allowed for simultaneous deletion of 2 DMRs in a single step  
275 with maintenance of a haploid karyotype. The generation of transgenic mice is one  
276 considerable application of haESCs as gametic genome replacement. Our data confirms  
277 previous reports that haESCs were suitable for generating semi-cloned embryos with  
278 high efficiency. Also, haESCs can be a powerful tool for genetic screening of factors  
279 required for fertilization or embryogenesis through injection of genetically modified  
280 haESCs into oocytes. To date, remarkable studies have reported the application of this  
281 haESC technology for genetic screening [16-18]. The mechanism how haESCs  
282 contribute to semi-cloned embryos remains an important focus for further study.  
283 Unexpectedly, polyploidy of semi-cloned embryos was frequent in our study. Further  
284 mechanistic insight on haESC contribution to embryos are needed for better  
285 understanding of gametic genome adaptation, which could also help to increase the  
286 efficiency of semi-cloning.

287

288

## 289 **Materials and Methods**

### 290 **Animals and experiments**

291 C57BL/6J and DBA/2J mice were purchased from Charles River Laboratories  
292 (Wilmington, USA). Swiss Webster and 129S6/SvEvTac mice were purchased from

293 Taconic Biosciences (Rensselaer, USA). All the mice were housed in the animal facility  
294 of ETH Zurich. All animal experiments were performed under the license ZH152/17 in  
295 accordance to the standards and regulations of the Cantonal Ethics Commission Zurich.

296

## 297 **Oocyte collection**

298 Four- to five-week-old female mice were induced to superovulate by injection of 5 IU  
299 pregnant mare's serum gonadotropin followed by 5 IU human chorionic gonadotropin  
300 (hCG). Cumulus-oocyte complexes (COCs) were collected from the oviducts 15-17  
301 hours after hCG injection and were placed in M2 medium. COCs were treated with 0.1%  
302 hyaluronidase until the cumulus cells disperses as indicated.

303

## 304 **Derivation and culture of phaESC lines**

305 Derivation of phaESC lines from 129S6/SvEvTac mice was performed as previously  
306 described [7]. For introducing deletions of the *IG*-DMR and *H19*-DMR using the CRISPR-  
307 Cas9 system, previously published oligonucleotides for guide RNAs (gRNAs) [16] were  
308 ligated into the pX330-U6-Chimeric\_BB-CBh-hSpCas9 vector (Addgene, #42230) that  
309 was digested with BbsI restriction enzyme (Fig. S1). Sequences of gRNAs are listed in  
310 Table S1. Simultaneous transfection of 4 Cas9/gRNA vectors, a *piggyBac* plasmid  
311 carrying a CAG-EGFP-IRES-hygro transgene, and a hyperactive *piggyBac* transposase  
312 plasmid was performed into a phaESC line using lipofectamine 2000 by following a  
313 manufacture's protocol. Subsequently single EGFP expressing haploid cells were  
314 isolated by flow cytometer (MoFlo Astrios EQ, Beckman Coulter) after staining with 15  
315 µg/ml Hoechst 33342 (Invitrogen). After the growth of clonal single colonies, a subset of

316 cells in each line were stained with Hoechst and analyzed by flow cytometer to select  
317 cell lines containing haploid cells. Each haploid cell line was maintained without mouse  
318 embryonic fibroblasts and were subjected to genotyping and karyotyping. Purification of  
319 haploid 1n cell population in each phaESC line was performed by cell sorting after  
320 staining with Hoechst every 4-6 passages.

321

## 322 **Construction of semi-cloned embryos**

323 Construction of semi-cloned embryos was performed following a published protocol [16]  
324 with a few modifications. Parthenogenetic haESCs with deletions of the *IG*-DMR and  
325 *H19*-DMR were arrested at M-phase by culturing in medium containing 0.05 mg/ml  
326 demecolcine (Merck) for 8 hours. After staining with Hoechst, DKO-phaESCs with a 2n  
327 DNA content were sorted by flow cytometer. In parallel, MII oocytes were harvested from  
328 superovulated B6D2F1 females. To construct semi-cloned embryos, sorted single cells  
329 were injected into MII oocytes using a piezo-driven micromanipulator (Eclipse Ti, Nikon;  
330 PiezoXpert, Eppendorf). After injection embryos were cultured in M16 medium for 1 hour  
331 and subsequently activated for 6 hours in KSOM medium containing 5 mM strontium  
332 chloride and 2 mM EGTA. After activation, embryos were washed and cultured in KSOM  
333 medium at 37°C under 5% CO<sub>2</sub> in air.

334

## 335 **Genotyping**

336 DNA extraction from cells and biopsies was performed using lysis buffer (100 mM Tris  
337 pH 8.5, 200 mM NaCl, 5 mM EDTA and 0.2% SDS) supplemented with 0.1 mg/ml  
338 proteinase K at 55°C for at least 4 hours. Debris were pelleted by centrifuging for 5

339 minutes at 13,000 rpm. Supernatant was replaced into a new tube containing equal  
340 volume of isopropanol. After mixing, the tube was centrifuged for 5 minutes at 13,000  
341 rpm to pellet precipitated genomic DNA. The pellet was washed with 70% ethanol and  
342 resuspended by 50-200  $\mu$ l water. PCR was performed using Phusion Hot Start II DNA  
343 Polymerase (Thermo Fisher Scientific) following the manufacturer's protocol. PCR  
344 products were separated by electrophoresis on 1.5% agarose gels and stained with  
345 ethidium bromide for visualization under a UV transilluminator. Primers used for  
346 genotyping are listed in Table S1.

347

## 348 **Transcription analysis**

349 RNA was extracted using the RNeasy Mini Kit (Qiagen) following the manufacturer's  
350 protocol, including an on-column DNA digest using RNase-free DNase (Qiagen). RNA  
351 concentration was determined using a NanoDrop Lite (Thermo Fisher Scientific). 500 ng  
352 total RNA was reverse transcribed using the PrimeScript RT Master Mix (Takara)  
353 according to the manufacturer's instruction. RT-PCR was performed at a 384 well format  
354 on the 480 Lightcycler instrument (Roche) using KAPA SYBR FAST qPCR KIT (Kapa  
355 Biosystems). Fold change expression was calculated using the  $\Delta\Delta$ ct method. *Gapdh*  
356 expression was used for normalization. Primers used for transcription analysis are listed  
357 in Table S1.

358

## 359 **Chromosome counting**

360 For karyotyping, chromosome spreads of ESCs were prepared on glass slides as  
361 described [29]. Chromosomes were stained with Giemsa solution (Merck), washed with



362 Gurr's buffer, and subsequently chromosomes were imaged under the microscope (Axio  
363 Observer Z1, Zeiss). Pictures were taken using an ORCA-Flash4.0 camera (Hamamatsu  
364 Photonics K.K.) and chromosome counts were determined.

365

### 366 ***In vitro* fertilization (IVF)**

367 Sperm mass collected from the cauda epididymis of Swiss Webster males were pre-  
368 incubated in Sequential Fert (ORIGIO) at 37°C under 5% CO<sub>2</sub> in air. COCs were  
369 harvested from the oviductal ampulla of superovulated Swiss Webster females. After 1  
370 hour of pre-incubation of sperm mass, a small aliquot of sperm suspension was added  
371 to a Sequential Fert drop containing COCs. Six hours later, oocytes were washed and  
372 transferred to KSOM medium. Embryo development to the 2-cell stage was assessed  
373 after 24 hours of IVF.

374

### 375 **Embryo transfer**

376 Recipient Swiss Webster females were mated with vasectomized Swiss Webster males  
377 the night before, and plugs were confirmed in the morning of the day of the embryo  
378 transfer. Nine or ten 2-cell embryos derived by DKO-phaESC injection and 5 control 2-  
379 cell embryos by IVF were transferred into the oviducts of pseudo-pregnant recipient  
380 females. On day 19.5 of gestation, full-term pups were naturally delivered from recipient  
381 females.

382

### 383 **Bisulfite sequencing**

384 Genomic DNA was extracted from toes of newborn semi-cloned mice and ear biopsy of

385 3 weeks old B6D2F1 mice with lysis buffer containing proteinase K, followed by  
386 isopropanol precipitation. Bisulfite conversion was performed using the EZ DNA  
387 methylation Gold kit (ZYMO Research). PCR was performed under the following  
388 temperature profile: 30 sec 98°C, 20 x (10 sec 98°C, 30 sec 65-55°C with -0.5°C per  
389 cycle, 30 sec 72°C), 35 x (10 sec 98°C, 30 sec 55°C, 30 sec 72°C), 5 min 72°C. The  
390 PCR products were cloned into pJet1.2 vector using the CloneJET PCR Cloning Kit  
391 (Thermo Fisher Scientific), followed by the transformation into competent DH5α *E.coli*.  
392 Insert sequences for each colony were obtained through the commercial Ecoli NightSeq  
393 service (Microsynth). Bisulfite sequencing was analyzed with the QUMA methylation  
394 analysis tool (<http://quma.cdb.riken.jp/>). Primers used for PCR and sequencing are listed  
395 in Table S1.

396

## 397 **Statistical analysis**

398 For comparison of quantitative RNA expression levels of imprinted genes,  
399 measurements were analyzed with the GraphPad Prism 8 software using a two-tailed  
400 unpaired t-test. A p-value < 0.05 was considered statistically significant.

401

402

## 403 **Acknowledgments**

404 We thank Mr. Stefan Butz and Dr. Tuncay Baubec for providing primers and advice on  
405 bisulfite sequencing. We also acknowledge Ms. Michèle Schaffner and Mr. Thomas M.  
406 Hennek for their technical support on embryo transfer. This work was supported by the  
407 Swiss National Science Foundation (grant 31003A\_152814/1).

408

409

## 410 **References**

- 411 1. Surani MA, Barton SC, Norris ML. Development of reconstituted mouse eggs  
412 suggests imprinting of the genome during gametogenesis. *Nature*.  
413 1984;308(5959):548-50.
- 414 2. Kawahara M, Wu Q, Takahashi N, Morita S, Yamada K, Ito M, et al. High-frequency  
415 generation of viable mice from engineered bi-maternal embryos. *Nat Biotechnol*.  
416 2007;25(9):1045-50.
- 417 3. Kono T, Obata Y, Wu Q, Niwa K, Ono Y, Yamamoto Y, et al. Birth of parthenogenetic  
418 mice that can develop to adulthood. *Nature*. 2004;428(6985):860-4.
- 419 4. Leighton PA, Ingram RS, Eggenschwiler J, Efstratiadis A, Tilghman SM. Disruption  
420 of imprinting caused by deletion of the H19 gene region in mice. *Nature*.  
421 1995;375(6526):34-9.
- 422 5. Lin SP, Youngson N, Takada S, Seitz H, Reik W, Paulsen M, et al. Asymmetric  
423 regulation of imprinting on the maternal and paternal chromosomes at the Dlk1-Gtl2  
424 imprinted cluster on mouse chromosome 12. *Nat Genet*. 2003;35(1):97-102.
- 425 6. Elling U, Taubenschmid J, Wirnsberger G, O'Malley R, Demers SP, Vanhaelen Q,  
426 et al. Forward and reverse genetics through derivation of haploid mouse embryonic  
427 stem cells. *Cell Stem Cell*. 2011;9(6):563-74.
- 428 7. Leeb M, Wutz A. Derivation of haploid embryonic stem cells from mouse embryos.  
429 *Nature*. 2011;479(7371):131-4.
- 430 8. Li W, Shuai L, Wan H, Dong M, Wang M, Sang L, et al. Androgenetic haploid

- 431 embryonic stem cells produce live transgenic mice. *Nature*. 2012;490(7420):407-11.
- 432 9. Yang H, Shi L, Wang BA, Liang D, Zhong C, Liu W, et al. Generation of genetically  
433 modified mice by oocyte injection of androgenetic haploid embryonic stem cells. *Cell*.  
434 2012;149(3):605-17.
- 435 10. Leeb M, Dietmann S, Paramor M, Niwa H, Smith A. Genetic exploration of the exit  
436 from self-renewal using haploid embryonic stem cells. *Cell Stem Cell*.  
437 2014;14(3):385-93.
- 438 11. Monfort A, Di Minin G, Postlmayr A, Freimann R, Arieti F, Thore S, et al. Identification  
439 of Spen as a Crucial Factor for Xist Function through Forward Genetic Screening in  
440 Haploid Embryonic Stem Cells. *Cell Rep*. 2015;12(4):554-61.
- 441 12. Pettitt SJ, Rehman FL, Bajrami I, Brough R, Wallberg F, Kozarewa I, et al. A genetic  
442 screen using the PiggyBac transposon in haploid cells identifies Parp1 as a mediator  
443 of olaparib toxicity. *PLoS One*. 2013;8(4):e61520.
- 444 13. Li Z, Wan H, Feng G, Wang L, He Z, Wang Y, et al. Birth of fertile bimaternal offspring  
445 following intracytoplasmic injection of parthenogenetic haploid embryonic stem cells.  
446 *Cell Res*. 2016;26(1):135-8.
- 447 14. Zhong C, Xie Z, Yin Q, Dong R, Yang S, Wu Y, et al. Parthenogenetic haploid  
448 embryonic stem cells efficiently support mouse generation by oocyte injection. *Cell*  
449 *Res*. 2016;26(1):131-4.
- 450 15. Wan H, He Z, Dong M, Gu T, Luo GZ, Teng F, et al. Parthenogenetic haploid  
451 embryonic stem cells produce fertile mice. *Cell Res*. 2013;23(11):1330-3.
- 452 16. Zhong C, Yin Q, Xie Z, Bai M, Dong R, Tang W, et al. CRISPR-Cas9-Mediated  
453 Genetic Screening in Mice with Haploid Embryonic Stem Cells Carrying a Guide

- 454 RNA Library. *Cell Stem Cell*. 2015;17(2):221-32.
- 455 17. Li ZK, Wang LY, Wang LB, Feng GH, Yuan XW, Liu C, et al. Generation of  
456 Bimaternal and Bipaternal Mice from Hypomethylated Haploid ESCs with Imprinting  
457 Region Deletions. *Cell Stem Cell*. 2018;23(5):665-76 e4.
- 458 18. Li Q, Li Y, Yang S, Huang S, Yan M, Ding Y, et al. CRISPR-Cas9-mediated base-  
459 editing screening in mice identifies DND1 amino acids that are critical for primordial  
460 germ cell development. *Nat Cell Biol*. 2018;20(11):1315-25.
- 461 19. Tsuiko O, Jatsenko T, Parameswaran Grace LK, Kurg A, Vermeesch JR, Lanner F,  
462 et al. A speculative outlook on embryonic aneuploidy: Can molecular pathways be  
463 involved? *Dev Biol*. 2019;447(1):3-13.
- 464 20. Storchova Z, Pellman D. From polyploidy to aneuploidy, genome instability and  
465 cancer. *Nat Rev Mol Cell Biol*. 2004;5(1):45-54.
- 466 21. Eglitis MA, Wiley LM. Tetraploidy and early development: effects on developmental  
467 timing and embryonic metabolism. *J Embryol Exp Morphol*. 1981;66:91-108.
- 468 22. Kaufman MH, Webb S. Postimplantation development of tetraploid mouse embryos  
469 produced by electrofusion. *Development*. 1990;110(4):1121-32.
- 470 23. Kono T, Obata Y, Yoshimizu T, Nakahara T, Carroll J. Epigenetic modifications  
471 during oocyte growth correlates with extended parthenogenetic development in the  
472 mouse. *Nat Genet*. 1996;13(1):91-4.
- 473 24. Plasschaert RN, Bartolomei MS. Genomic imprinting in development, growth,  
474 behavior and stem cells. *Development*. 2014;141(9):1805-13.
- 475 25. Potapova T, Gorbisky GJ. The Consequences of Chromosome Segregation Errors  
476 in Mitosis and Meiosis. *Biology (Basel)*. 2017;6(1).

- 477 26. Amano T, Kato Y, Tsunoda Y. Comparison of heat-treated and tetraploid blastocysts  
478 for the production of completely ES-cell-derived mice. *Zygote*. 2001;9(2):153-7.
- 479 27. Eggan K, Akutsu H, Loring J, Jackson-Grusby L, Klemm M, Rideout WM, 3rd, et al.  
480 Hybrid vigor, fetal overgrowth, and viability of mice derived by nuclear cloning and  
481 tetraploid embryo complementation. *Proc Natl Acad Sci U S A*. 2001;98(11):6209-  
482 14.
- 483 28. Nagy A, Gocza E, Diaz EM, Prideaux VR, Ivanyi E, Markkula M, et al. Embryonic  
484 stem cells alone are able to support fetal development in the mouse. *Development*.  
485 1990;110(3):815-21.
- 486 29. Campos PB, Sartore RC, Abdalla SN, Rehen SK. Chromosomal spread preparation  
487 of human embryonic stem cells for karyotyping. *J Vis Exp*. 2009(31).

488

489

## 490 **Supporting Information**

491 **S1 Fig. Deletions of the *IG*-DMR and *H19*-DMR in phaESC lines.** (A) A design of  
492 gRNAs and primers targeting the deletions of the *IG*-DMR. (B) A design of gRNAs and  
493 primers targeting the deletions of the *H19*-DMR. (C) PCR fragments flanking both *IG*-  
494 DMR (319 bp) and *H19*-DMR (407 bp) by primers targeting deleted loci were observed  
495 in 2 DKO-phaESC lines, whereas the deleted sequences were absent in DKO-phaESC-1  
496 and DKO-phaESC-2.

497

498 **S2 Fig. Derivation and genotyping of scESC lines.** (A) Derivation of scESC lines from  
499 blastocysts generated by injection of DKO-phaESCs into oocytes. Images of blastocysts,

500 outgrowth (passage 0) and scESCs after derivation are shown. Regular black bar, 100  
501  $\mu\text{m}$ ; bold black bar, 200  $\mu\text{m}$ ; white bar, 100  $\mu\text{m}$ . (B) Genotyping of 3 scESC lines. All 3  
502 scESC lines exhibited both wild type and mutant alleles for the *IG*-DMR and *H19*-DMR,  
503 indicating both oocytes and DKO-phaESCs genome contributed to the genome of  
504 blastocysts.

505

506 **S3 Fig. Genotyping of pups born to semi-cloned mice.** PCR-based genotyping was  
507 performed for 15 pups born to semi-cloned females (progeny no.6 and 7) and wild type  
508 Swiss Webster males. EGFP transgene was inherited to 7 among 15 pups.

509

510 **S1 Table. List of oligos.**

511

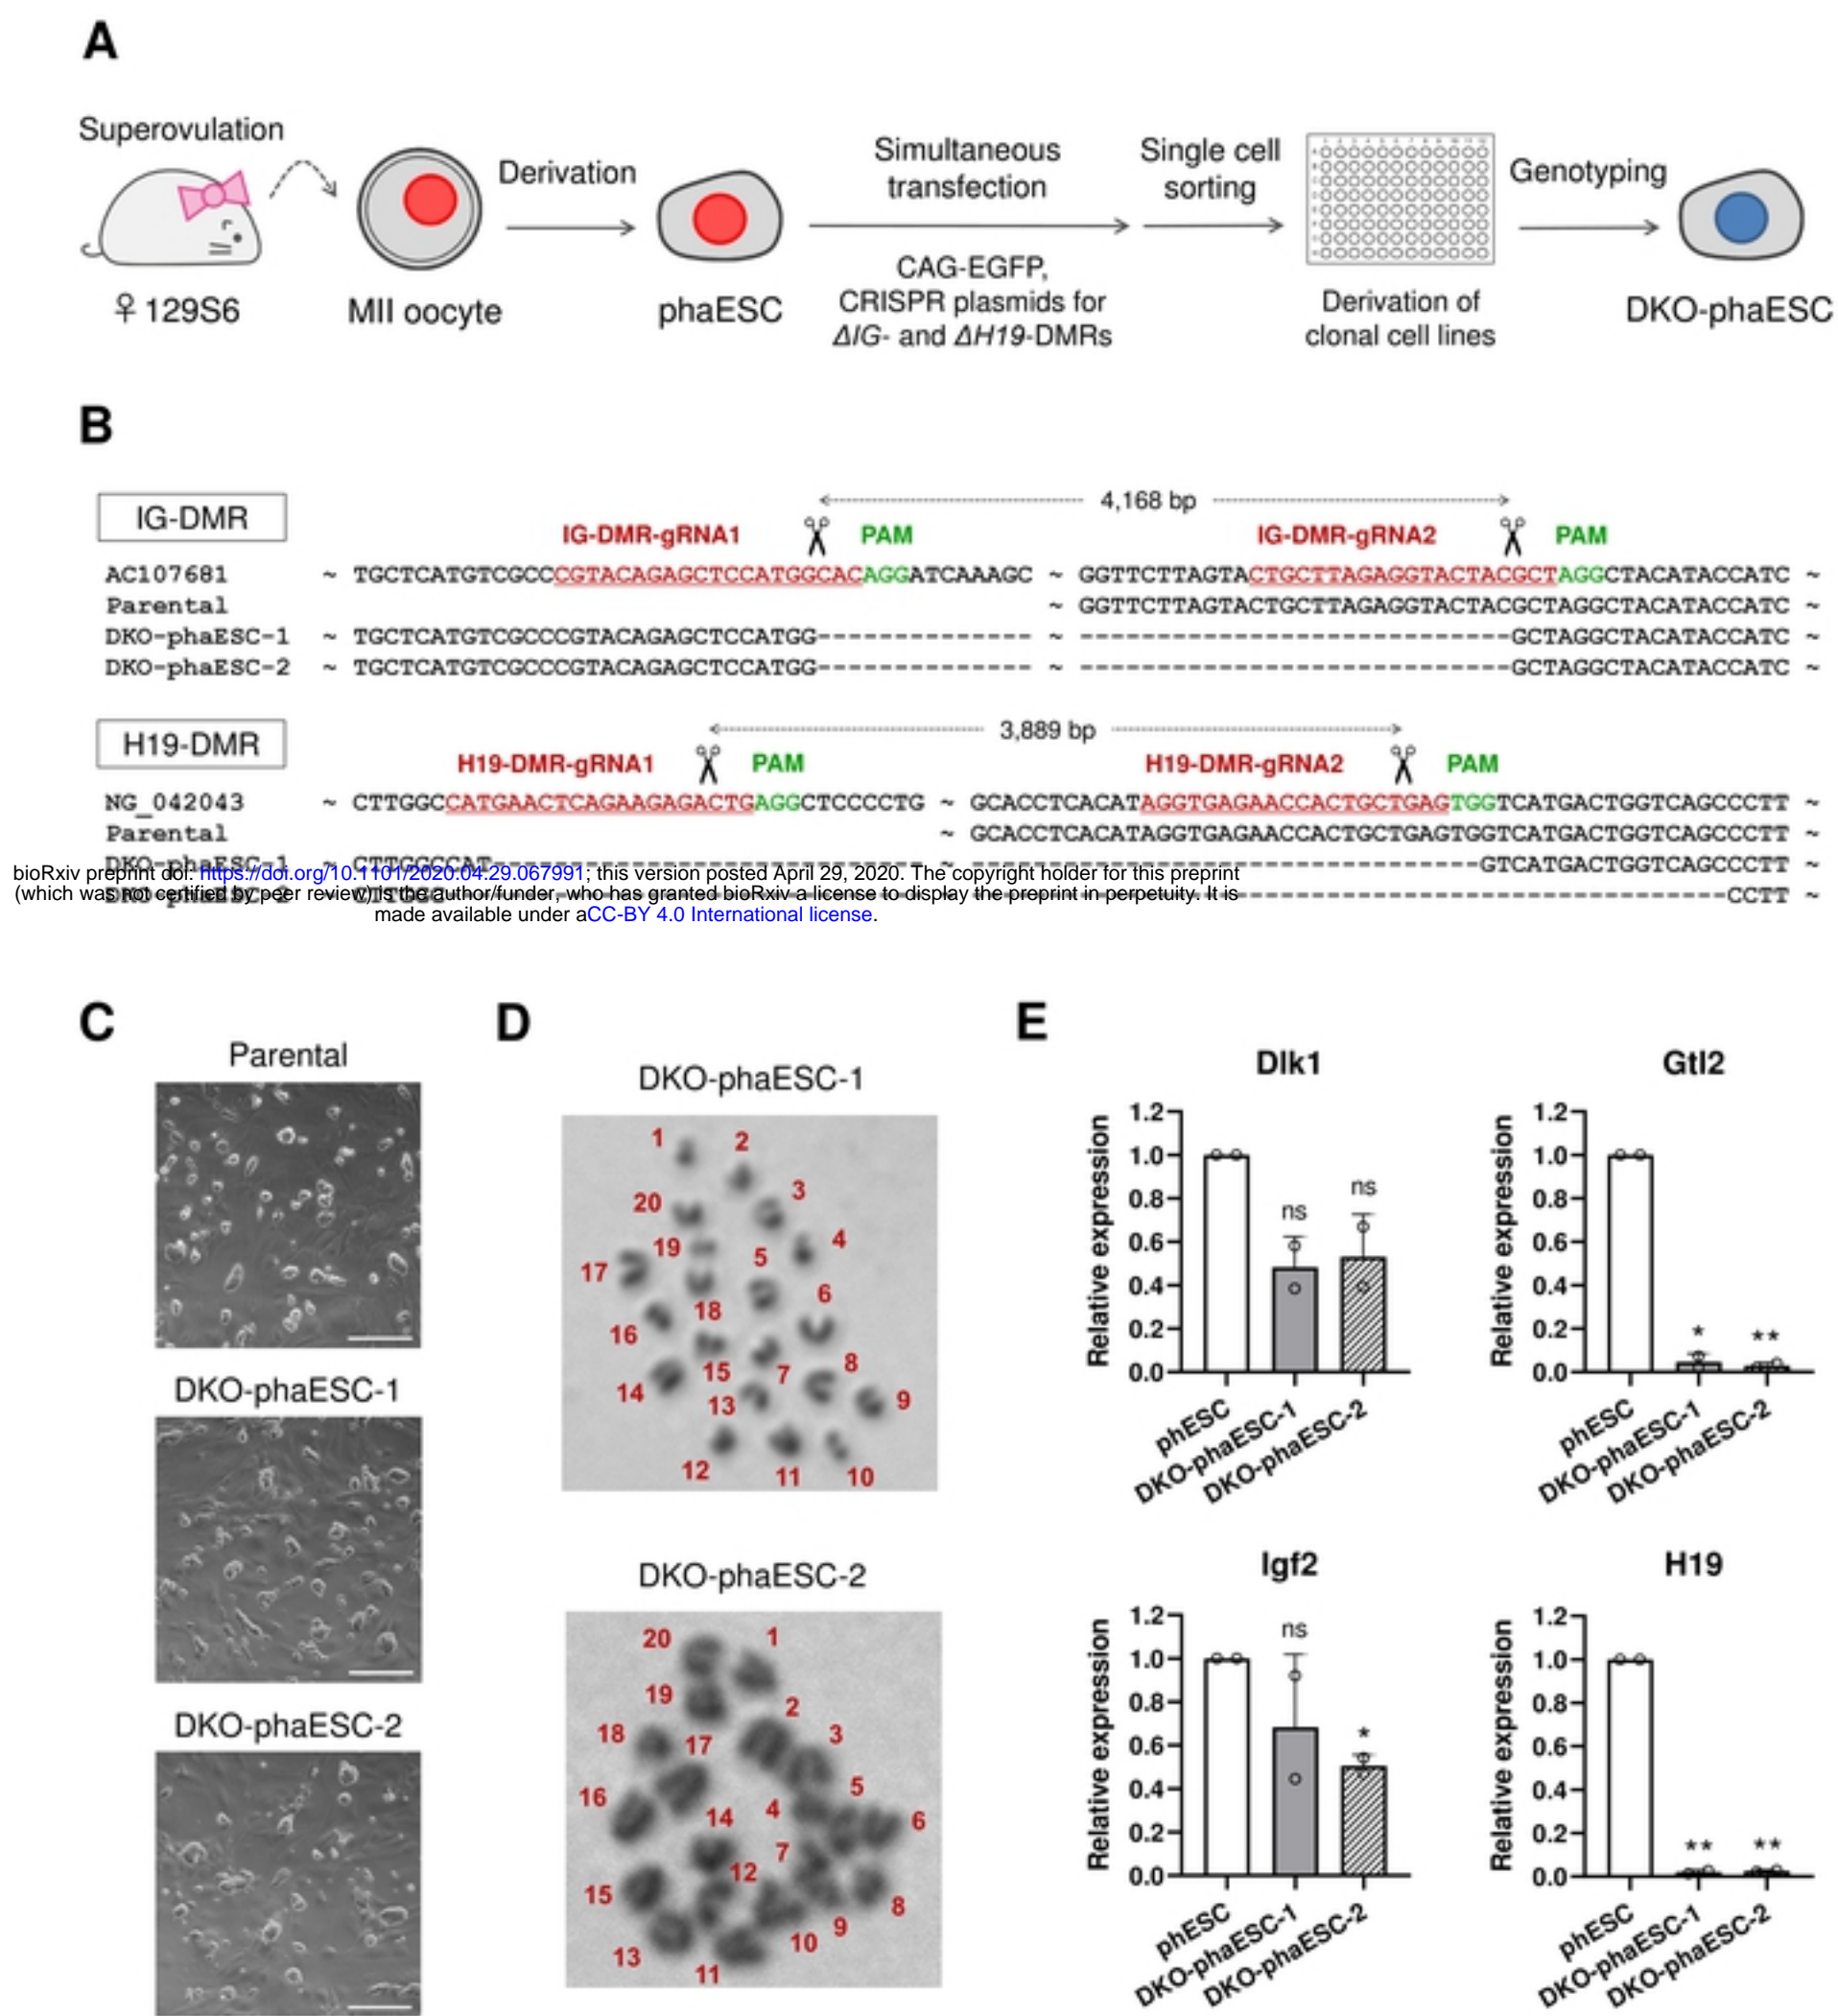

Figure 1



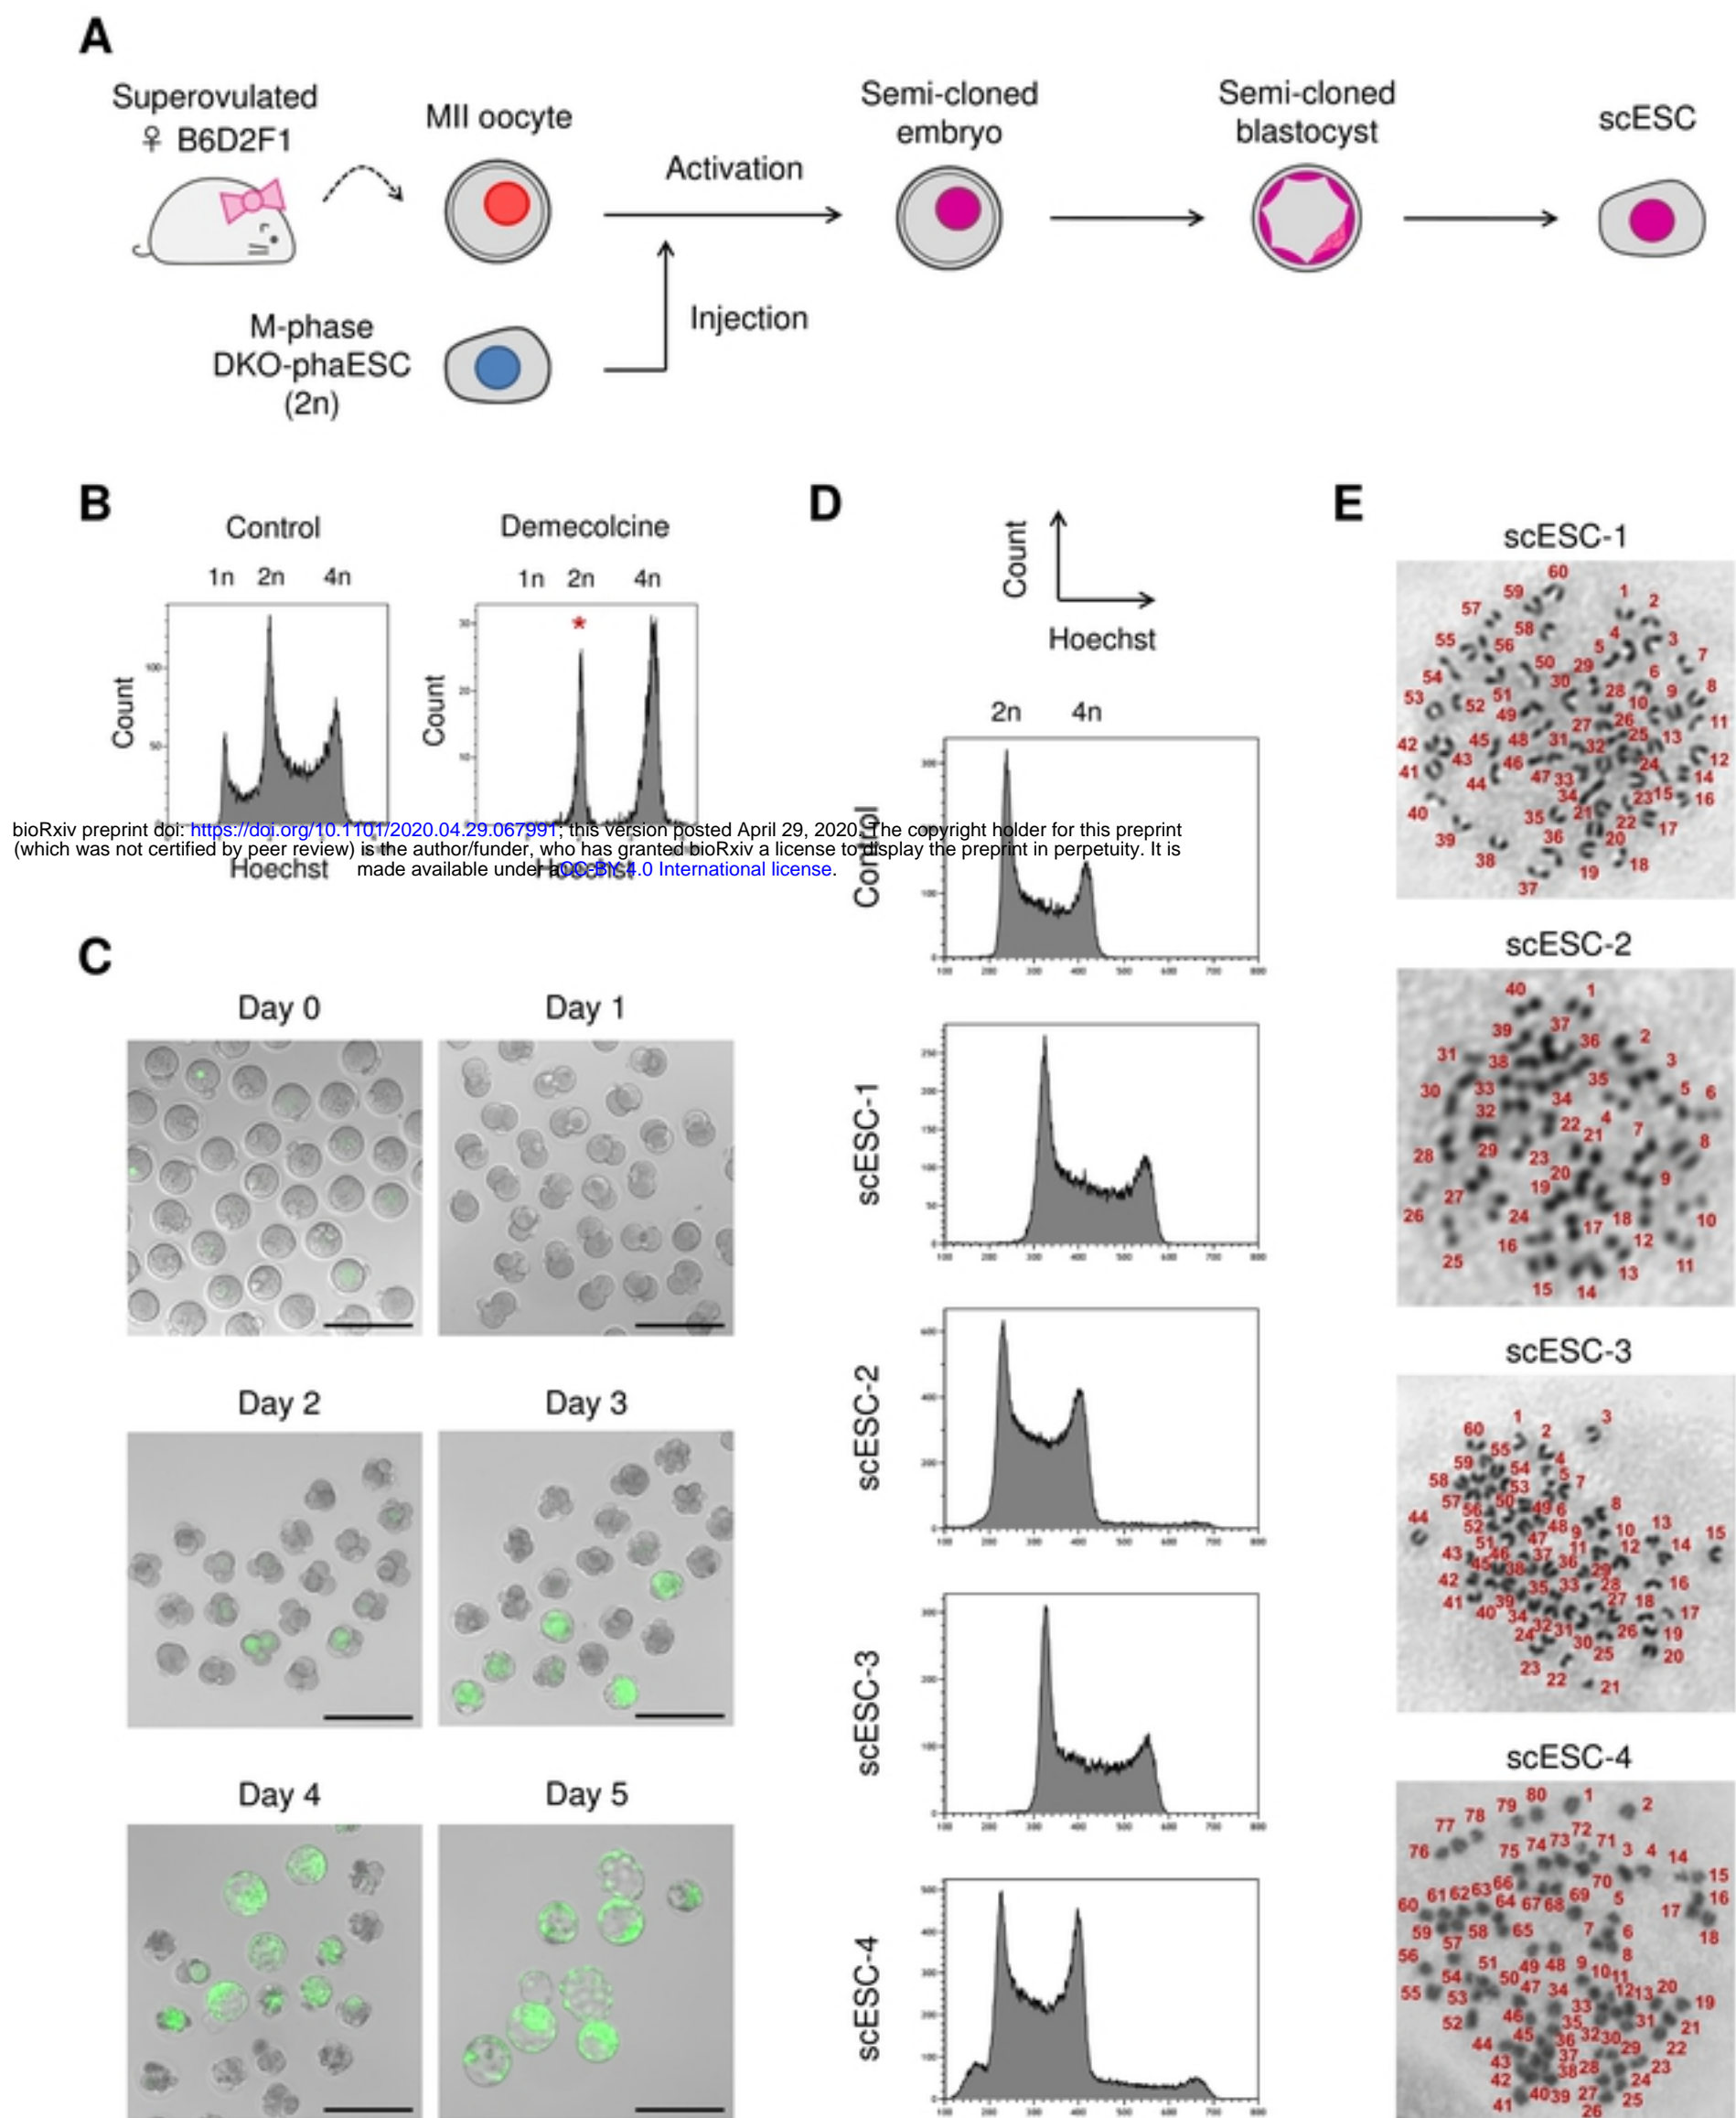

Figure 2

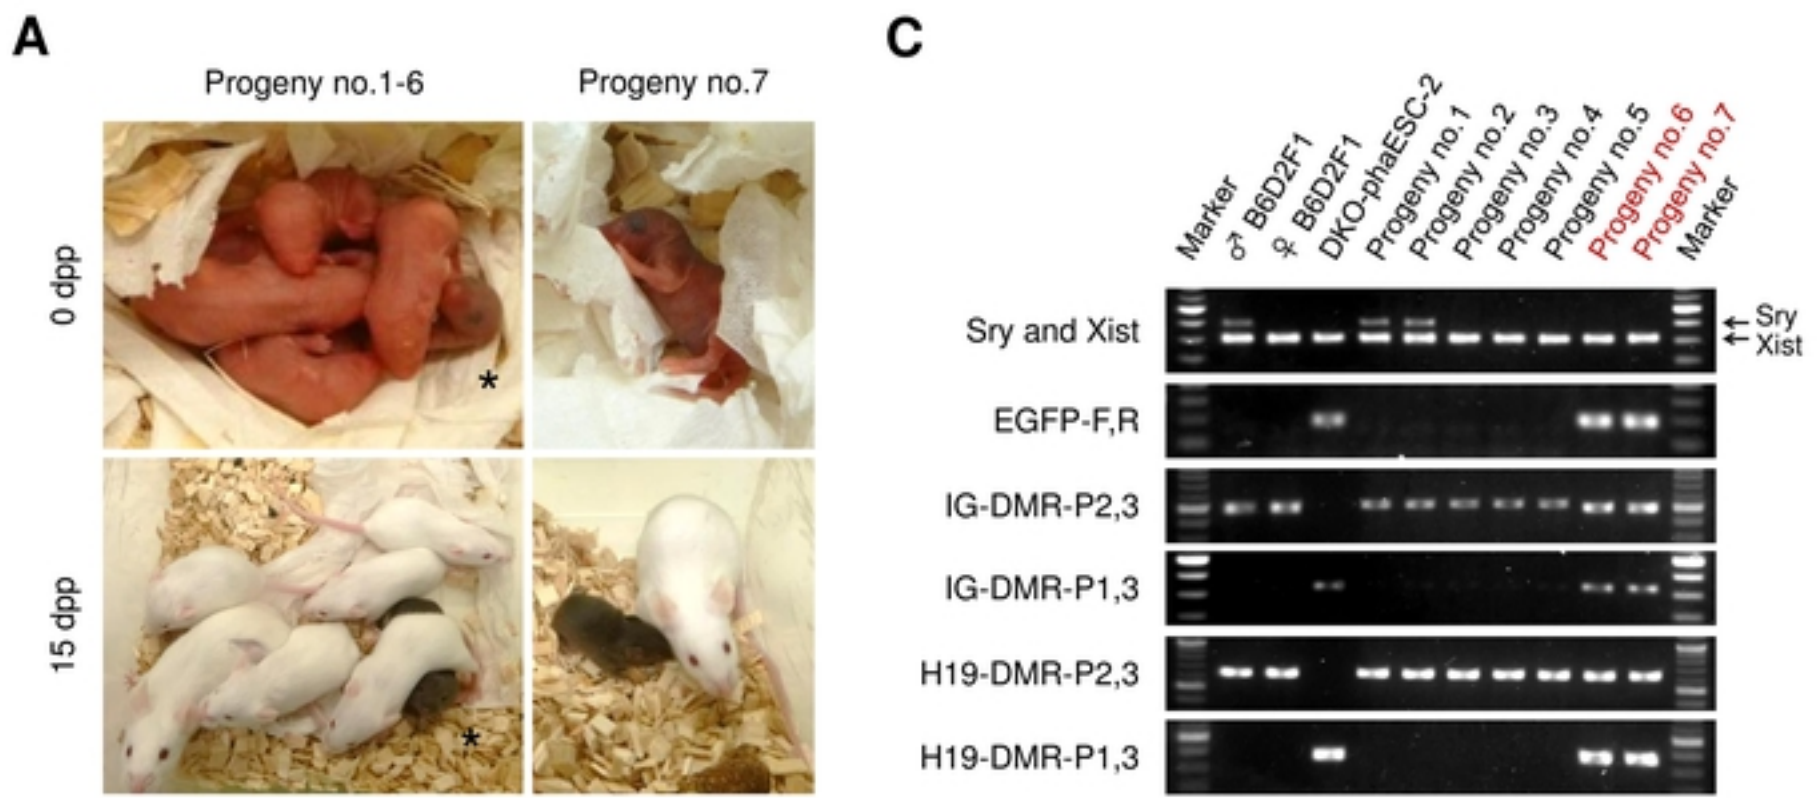

bioRxiv preprint doi: <https://doi.org/10.1101/2020.04.29.067991>; this version posted April 29, 2020. The copyright holder for this preprint (which was not certified by peer review) is the author/funder, who has granted bioRxiv a license to display the preprint in perpetuity. It is made available under aCC-BY 4.0 International license.

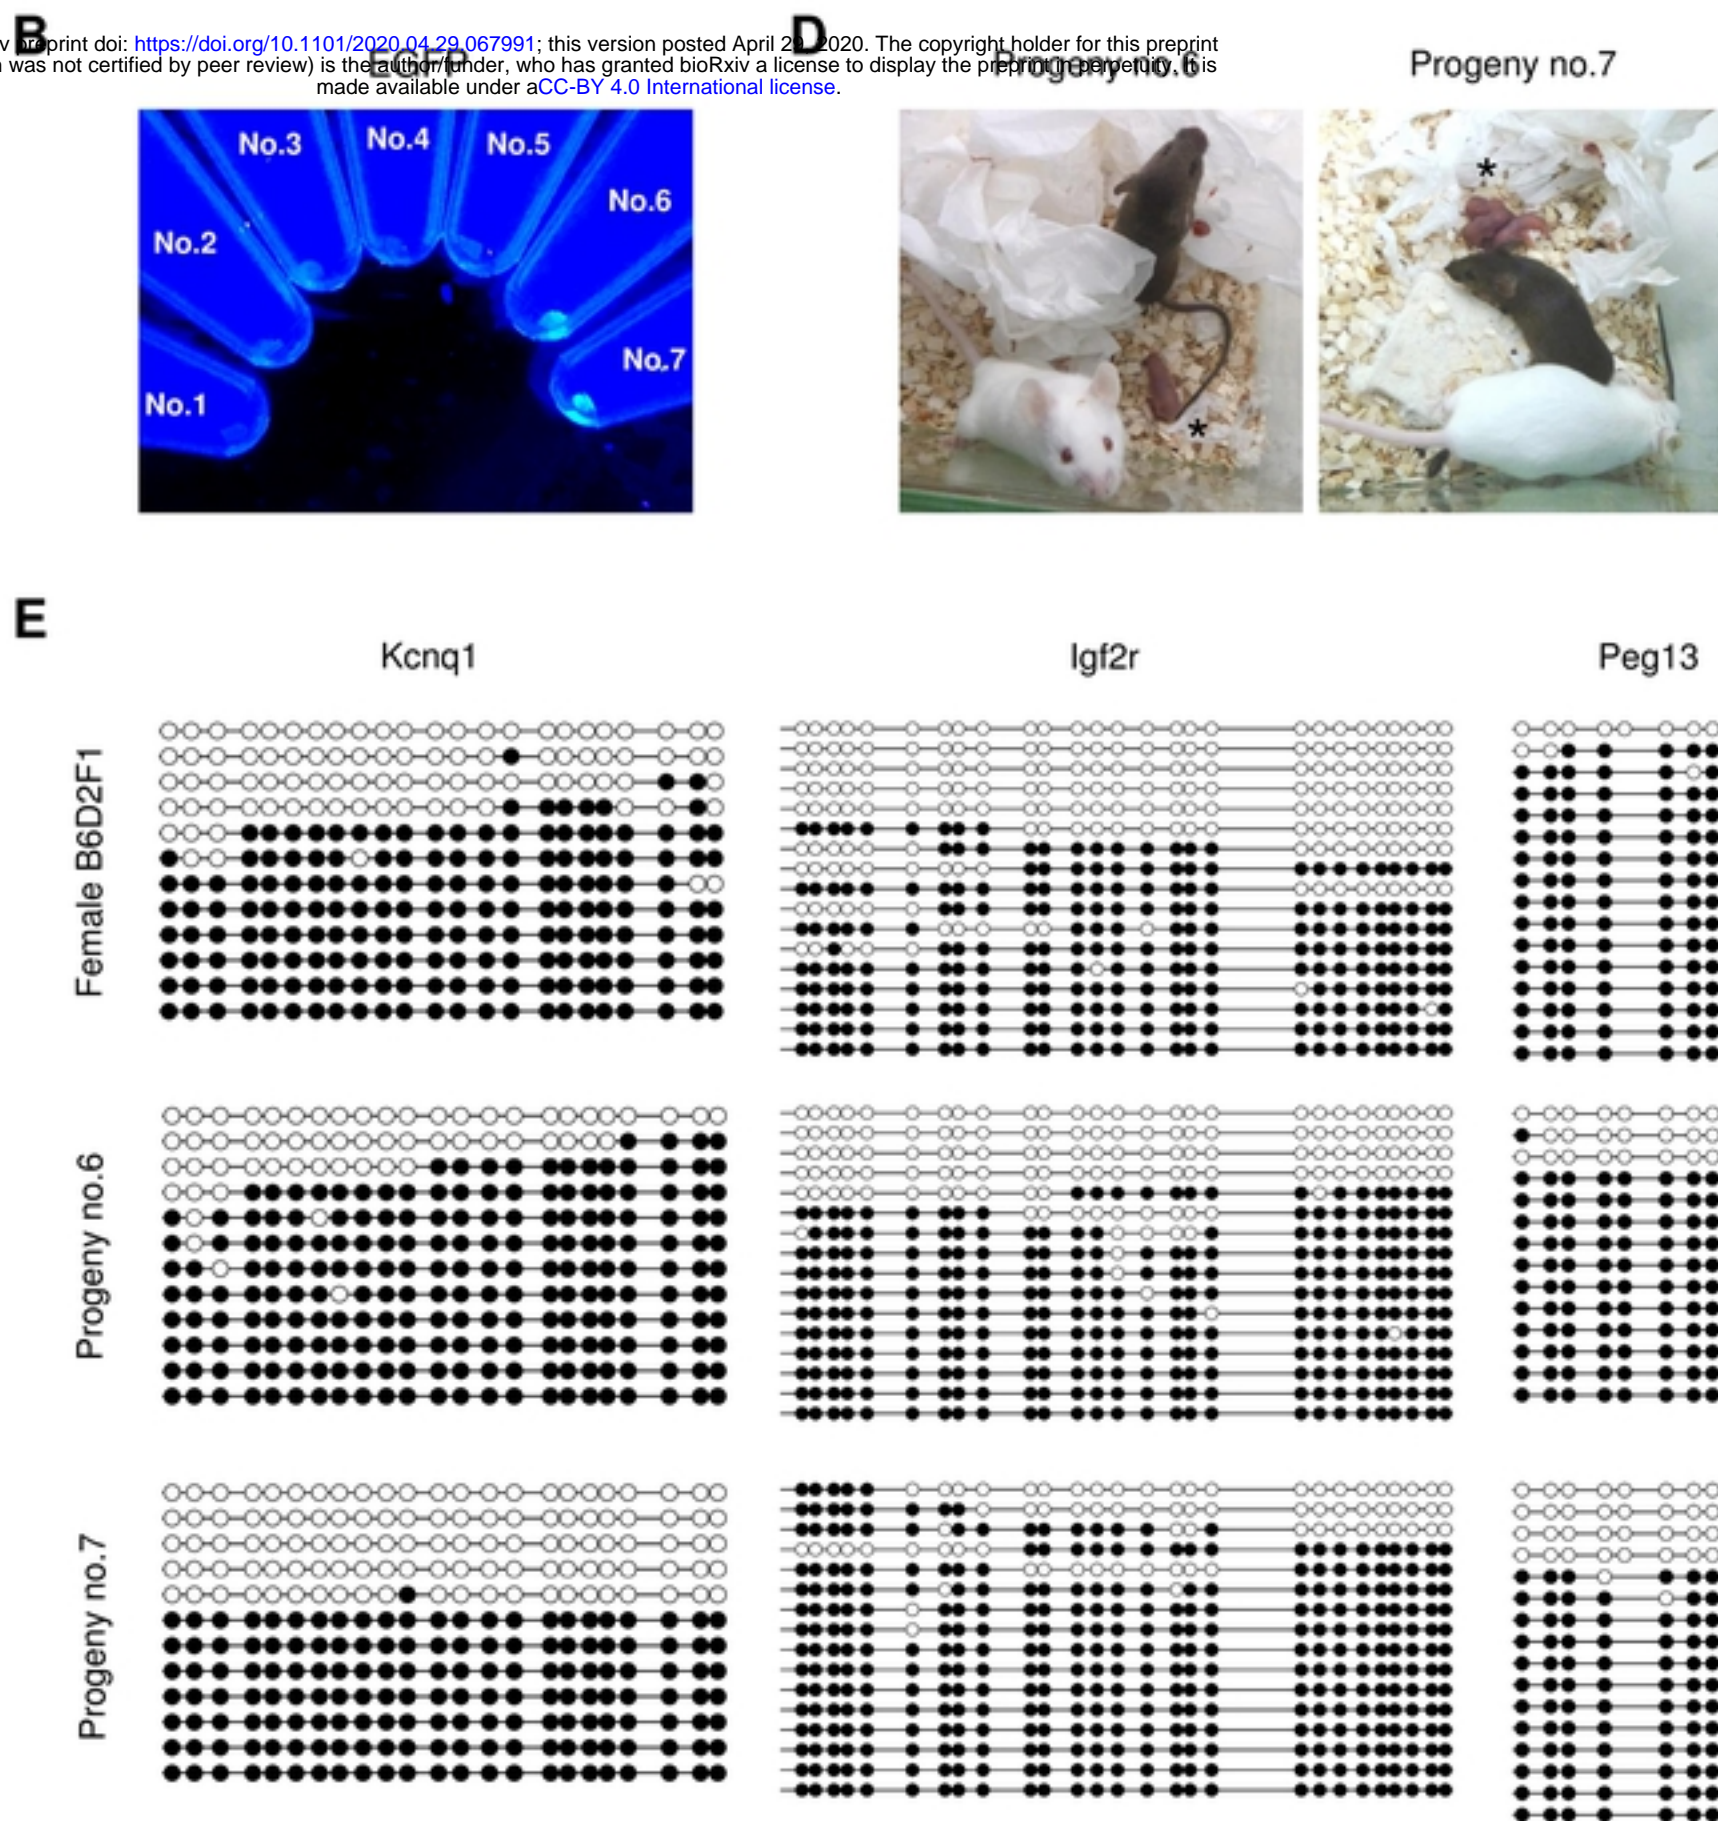

Figure 3
